# Supplementary material for: Early Variations in White Matter Microstructure and Depression Outcome in Adolescents With Subthreshold Depression
Source: Atypon-hosted journal article supplement (doi:10.1176/appi.ajp.2018.17070825), 2018-08-22
Supplement: appi.ajp.2018.17070825.ds001.pdf [file appi.ajp.2018.17070825.ds001.pdf]

## Method

### Participants

#### Baseline assessment

Parental psychiatric history was assessed using a modified version of the Family Interview for Genetics Studies, the GEN (Genetic Screening and Family History of Psychiatric Disorders Interview) (1). Parental psychiatric history was self-reported by one of the parents. The assessed diagnoses were: major depressive disorder, schizophrenia, schizoaffective disorder, bipolar disorder, obsessive-compulsive disorder, anxiety disorder, eating disorder, alcohol problems, drug problems, and “other diagnosis”.

**FIGURE S1.** Flow diagram of group selection

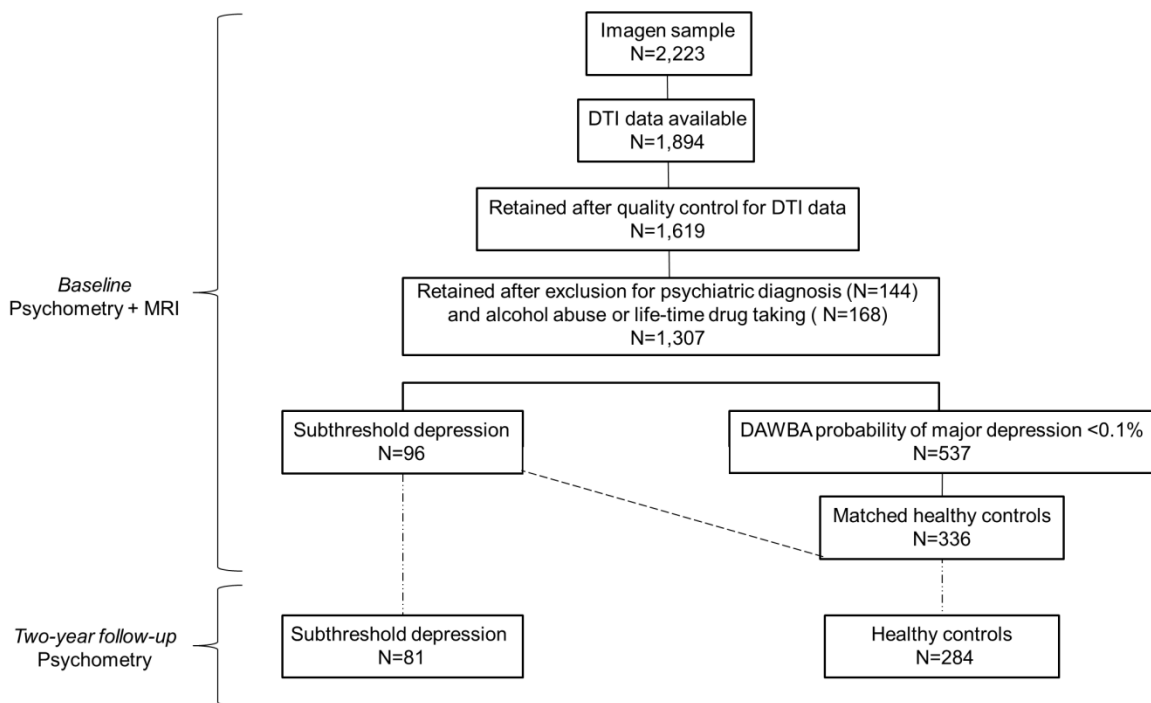

### ***Follow-up assessment***

Lost-to-follow-up participants did not differ from those followed-up in any characteristic, except that they were more likely to be non-Caucasian (n=20 (29.85%), versus n=28 (7.67%) followed-up;  $\chi^2(1, N=432)=13.11$ ;  $p<0.001$ ).

### ***MRI data acquisition and preprocessing***

Diffusion tensor images were obtained at age 14 on 3 Tesla scanners (Siemens; Philips; General Electric). The diffusion tensor images were acquired using an Echo Planar imaging sequence (4 b-value=0 s/mm<sup>2</sup> and 32 diffusion encoding directions with b-value=1300 s/mm<sup>2</sup>; 60 oblique-axial slices (angulated parallel to the anterior commissure/ posterior commissure line); echo time  $\approx$  104 ms; 128x128 matrix; field of view 307x307mm; voxel size 2.4 x 2.4 x 2.4 mm), adapted to tensor measurements and tractography analysis. Where available, a peripherally gated sequence was used; when this was not possible, TR was set to 15s, approximately matching the effective TR of the gated scans.

Diffusion data preprocessing was performed using FMRIB Diffusion Toolbox (FDT) in FMRIB Software Library (FSL) ([www.fmrib.ox.ac.uk/fsl](http://www.fmrib.ox.ac.uk/fsl)) and consisted of affine registration to the first b=0 image for head motion and eddy currents correction, brain extraction using the Brain Extraction Tool (BET) (2), and voxel-wise diffusion tensor fitting to obtain images of fractional anisotropy (FA), mean diffusivity (MD), Axial Diffusivity (AD) and Radial Diffusivity (RD).

### ***Post-hoc analyses***

#### ***Specificity of the neuroimaging findings in the study sample***

In order to explore the specificity of lower FA values in the tracts spanning from the anterior corpus callosum cluster to the anterior cingulate cortex, we first explored the association between lower FA values in those tracts at age 14 and risk for other diagnoses than depression at age 16.

Due to the small number of participants making a transition to a validated diagnosis of a full-blown disorder between ages 14 and 16, the probabilities of having a diagnosis, measured with the DAWBA bands, were used as risk levels. The DAWBA generates six levels of risk for each diagnosis: <0.1%, ~0.5%, ~3%, ~15%,

~50%, >70%. We used the DAWBA probabilities of having a DSM-IV diagnosis at age 16 to define risk for generalized anxiety disorder, social phobia, panic disorder, obsessive compulsive disorder, attention deficit hyperactivity disorder, oppositional-defiant disorder, and conduct disorders. A general probability of having "any DSM-IV diagnosis" at age 16 was also used.

We first examined the association between group (subthreshold-depression or control) and risk for psychiatric disorders. We used Poisson regression models with the 6 levels of risk for each of the 7 diagnoses at age 16 and for "any DSM-IV diagnosis" at age 16 as the outcomes in 8 separate models. Group at age 14 was entered as predictor of interest. Age, sex and centers were entered as confounding covariates.

Then, we examined the association between FA values and risk for psychiatric disorders at age 16 when an association with subthreshold-depression at age 14 had been found. We used Poisson regression models with the 6 levels of risk for the diagnosis at age 16. FA values at age 14 were entered as predictor of interest. Age, sex and DTI acquisition type were entered as confounding covariates.

#### *Specificity of the clinical findings in the study sample*

Based on the clinical findings, that higher scores of neuroticism and hopelessness at age 14 were associated with an increased risk for depression diagnosis at age 16, we examined whether higher scores for neuroticism and hopelessness at age 14 could mediate the association between subthreshold-depression at age 14 and depression at age 16.

Causal mediation analyses (3) were conducted using neuroticism or hopelessness score at age 14 as mediator variable in two separated models. Depression at age 16 was entered as dependent factor, and group (subthreshold-depression or control) as independent factor within a logistic regression model. Age, sex and center were entered as confounding covariates.

Then in order to explore the specificity of higher scores of neuroticism and hopelessness, we explored the association between these scores at age 14 and risk for other diagnoses than depression at age 16. We used Poisson regression models with the 6 levels of risk for "any DSM-IV diagnosis" at age 16 as the

outcome. Neuroticism or hopelessness scores at age 14 were entered as predictor of interest. Age, sex and centers were entered as confounding covariates.

If the association was significant, we then searched for a mediation effect of higher scores of neuroticism or hopelessness on the relationship between subthreshold-depression at age 14 and increased risk for any psychiatric disorder. Causal mediation analyses (3) were conducted using scores of neuroticism or hopelessness at age 14 as mediator variable in two separated models. The six probability levels of having "any DSM-IV diagnosis" at age 16 were entered as dependent factor within a Poisson regression model. Age, sex and center were entered as confounding covariates.

#### *Reproducibility of the findings in a distinct sample (n=686)*

Based on the main findings, we tested the complementary hypothesis that lower FA values in tracts spanning from the anterior corpus callosum cluster to the anterior cingulate cortex were associated with higher risk levels of depression at follow-up in a distinct sample of healthy adolescents at baseline.

The distinct sample of healthy adolescents drawn from the IMAGEN database had no overlap with the study sample (subthreshold-depression and control). At baseline, these adolescents had no validated psychiatric diagnosis, no life-time history of drug use, and no symptom of alcohol abuse or dependence (AUDIT score >4). No participant or their parent reported being prescribed antidepressants, mood stabilizers, anxiolytics, antipsychotics or hypnotics. After quality control for neuroimaging data the sample included 686 adolescents.

In this distinct sample, mean FA at age 14 was computed for each adolescent's FA image within a mask (mean samples > 1000) of tracts spanning between the anterior corpus callosum cluster to the anterior cingulate cortex derived from the original sample of 432 adolescents.

We used the DAWBA probabilities of having a diagnosis of depression at age 16 to define the risk level.

We used Poisson regression models with the 6 levels of risk for depression at age 16 as the outcome and FA values at age 14 as predictor of interest. Age, sex and DTI acquisition type were entered as confounding covariates.

### *Specificity of the neuroimaging findings in the distinct sample*

We explored the specificity of lower FA values in other diagnoses than depression in the distinct sample of healthy adolescents at baseline.

We used Poisson regression models with the 6 levels of risk for each of the 7 diagnoses other than depression at age 16 and for "any DSM-IV diagnosis" at age 16 as the outcomes in 8 separate models. FA values in tracts spanning from the anterior corpus callosum cluster to the anterior cingulate cortex 14 were entered as predictor of interest. Age, sex and DTI acquisition type were entered as confounding covariates.

### *Machine Learning based on FA values derived from tractography in the study sample.*

We performed a machine learning analysis aiming at predicting depression diagnosis at age 16, based on FA values in tracts spanning from the anterior corpus callosum cluster to the anterior cingulate cortex at age 14. We used a leave-one-out cross-validation procedure where FA values were used as predictors of depression diagnosis at age 16. For each fold, a linear support vector machine classifier was trained on the training set, and then used to compute a classification score for the remaining subject from the test set. The overall predictive power is assessed by computing the *Area Under the Curve* (AUC) using depression diagnosis at age 16 and predicted scores across all folds. In order to assess the significance of such test statistic (i.e. the AUC value), we generated an empirical null distribution using permutations. We re-performed the whole leave-one-out analysis 5000 times where each time, depression diagnosis was randomly shuffled with respect to FA values. Then, the original observed AUC value was compared to this null distribution to obtain a p-value.

## Results

### Tractography analysis

**TABLE S1.** Results of the probabilistic tractography analyses in adolescents with subthreshold-depression compared with controls.

|                                                                                          | Subthreshold depression |       | Controls |       | Test                  |             | Subthreshold depression |       | Controls                              |       | Test     |             | Subthreshold depression |       | Controls |       | Test     |             |  |
|------------------------------------------------------------------------------------------|-------------------------|-------|----------|-------|-----------------------|-------------|-------------------------|-------|---------------------------------------|-------|----------|-------------|-------------------------|-------|----------|-------|----------|-------------|--|
|                                                                                          | N=96                    | N=336 | N=96     | N=336 | N=96                  | N=336       | N=96                    | N=336 | N=96                                  | N=336 | N=96     | N=336       | N=96                    | N=336 | N=96     | N=336 | N=96     | N=336       |  |
|                                                                                          | Number of samples       |       |          |       | Fractional Anisotropy |             |                         |       | Mean Diffusivity ( $\times 10^{-4}$ ) |       |          |             |                         |       |          |       |          |             |  |
|                                                                                          | Mean                    | SD    | Mean     | SD    | F(1,420)              | $p_c$       | Mean                    | SD    | Mean                                  | SD    | F(1,420) | $p_c$       | Mean                    | SD    | Mean     | SD    | F(1,420) | $p_c$       |  |
| <b>Tractography analyses using the anterior corpus callosum cluster as a seed region</b> |                         |       |          |       |                       |             |                         |       |                                       |       |          |             |                         |       |          |       |          |             |  |
| <b>Target regions</b>                                                                    |                         |       |          |       |                       |             |                         |       |                                       |       |          |             |                         |       |          |       |          |             |  |
| Anterior cingulate                                                                       | 1695                    | 526   | 1719     | 671   | 0.03                  | >0.99       | 0.45                    | 0.03  | 0.46                                  | 0.03  | 8.85     | <b>0.03</b> | 8.04                    | 0.46  | 7.85     | 0.36  | 8.56     | <b>0.04</b> |  |
| Middle frontal                                                                           | 2843                    | 848   | 2863     | 852   | 0.66                  | >0.99       | 0.41                    | 0.03  | 0.42                                  | 0.04  | 4.05     | 0.45        | 7.94                    | 0.41  | 7.78     | 0.33  | 5.64     | 0.18        |  |
| Frontal pole                                                                             | 2566                    | 441   | 2580     | 504   | 0.09                  | >0.99       | 0.39                    | 0.03  | 0.40                                  | 0.03  | 3.63     | 0.57        | 8.16                    | 0.48  | 7.97     | 0.38  | 6.48     | 0.11        |  |
| Superior frontal                                                                         | 3272                    | 660   | 3276     | 655   | 1.02                  | >0.99       | 0.41                    | 0.02  | 0.41                                  | 0.03  | 1.42     | >0.99       | 8.11                    | 0.45  | 7.94     | 0.36  | 4.16     | 0.42        |  |
| Paracingulate                                                                            | 1214                    | 638   | 1226     | 695   | 0.97                  | >0.99       | 0.47                    | 0.03  | 0.47                                  | 0.03  | 1.68     | >0.99       | 7.95                    | 0.46  | 7.77     | 0.36  | 6.68     | 0.10        |  |
| <b>A priori tractography analyses of the uncinate fasciculus and cingulum</b>            |                         |       |          |       |                       |             |                         |       |                                       |       |          |             |                         |       |          |       |          |             |  |
| Cingulum R                                                                               | 19284                   | 15187 | 14637    | 11804 | 6.58                  | <b>0.04</b> | 0.35                    | 0.03  | 0.36                                  | 0.04  | 9.17     | <b>0.01</b> | 8.16                    | 0.54  | 7.98     | 0.49  | 3.56     | 0.24        |  |
| Cingulum L                                                                               | 19824                   | 14641 | 17510    | 11854 | 1.02                  | >0.99       | 0.37                    | 0.04  | 0.38                                  | 0.04  | 5.21     | 0.09        | 8.25                    | 0.53  | 8.09     | 0.46  | 2.39     | 0.49        |  |
| Uncinate R                                                                               | 22377                   | 15118 | 20111    | 12774 | 0.02                  | >0.99       | 0.40                    | 0.04  | 0.40                                  | 0.04  | 0.04     | >0.99       | 7.85                    | 0.40  | 7.77     | 0.31  | 0.86     | >0.99       |  |
| Uncinate L                                                                               | 17550                   | 12637 | 15710    | 10673 | 0.02                  | >0.99       | 0.40                    | 0.05  | 0.40                                  | 0.05  | 0.71     | >0.99       | 8.01                    | 0.47  | 7.88     | 0.35  | 0.09     | >0.99       |  |

SD, standard deviation; F, ANOVA's F-value,  $p_c$ , p values corrected for multiple comparisons; **bold** figures indicate significant results at  $p < 0.05$   
R, Right; L, Left.

## Longitudinal analyses

**TABLE S2.** Association between neuroticism and hopelessness at age 14 with DTI measures

|                                                                                         | Neuroticism             |       |             | Hopelessness            |       |             |
|-----------------------------------------------------------------------------------------|-------------------------|-------|-------------|-------------------------|-------|-------------|
|                                                                                         | $\beta$                 | t     | $p^\dagger$ | $\beta$                 | t     | $p^\dagger$ |
| mean FA values within the whole skeleton                                                | $-6.44 \times 10^{-05}$ | -0.71 | 0.48        | $-2.91 \times 10^{-05}$ | -0.13 | 0.87        |
| mean FA values within the voxel-wise comparison cluster                                 | $-3.85 \times 10^{-04}$ | -1.54 | 0.12        | $-4.61 \times 10^{-04}$ | -0.75 | 0.46        |
| mean FA values within the tracts spanning from voxel-wise comparison cluster to the ACC | $-2.14 \times 10^{-04}$ | -1.18 | 0.24        | $-4.38 \times 10^{-04}$ | -0.98 | 0.33        |
| mean FA values within the right cingulum bundle                                         | $-4.89 \times 10^{-04}$ | -1.40 | 0.16        | $-6.00 \times 10^{-04}$ | -0.69 | 0.49        |

$^\dagger$  p values uncorrected for multiple comparisons; ACC: anterior cingulate cortex  
Models were adjusted for age, sex, and DTI acquisition type.

## Post-hoc analyses

### Specificity of the findings in the study sample

The DAWBA "bands" distribution is described in ST3.

In the study sample, subthreshold-depression at age 14 was associated with higher risk at age 16 for generalized anxiety disorder ( $\beta=0.46$ ,  $z=2.75$ ,  $p=0.006$ ), obsessive compulsive disorder ( $\beta=0.71$ ,  $z=3.14$ ,  $p=0.007$ ), attention deficit hyperactivity disorder ( $\beta=0.84$ ,  $z=3.89$ ,  $p<0.001$ ), and conduct disorders at follow-up ( $\beta=0.65$ ,  $z=3.21$ ,  $p=0.001$ ). Subthreshold-depression did not predict social phobia ( $\beta=-0.01$ ,  $z=-0.02$ ,  $p=0.98$ ), panic disorder ( $\beta=0.32$ ,  $z=0.70$ ,  $p=0.48$ ), or oppositional-defiant disorder ( $\beta=0.19$ ,  $z=1.71$ ,  $p=0.09$ ). Subthreshold-depression was also associated with higher risk for "any DSM-IV diagnosis" at age 16 ( $\beta=0.28$ ,  $z=3.06$ ,  $p=0.002$ ).

In contrast, lower FA values did not predict higher risk for any other diagnosis than depression at follow-up (generalized anxiety disorder ( $\beta=-3.17$ ,  $z=-1.13$ ,  $p=0.26$ ), obsessive compulsive disorder ( $\beta=-1.03$ ,  $z=-0.29$ ,  $p=0.78$ ), attention deficit hyperactivity disorder ( $\beta=-3.04$ ,  $z=-0.84$ ,  $p=0.40$ ), conduct disorders ( $\beta=-3.61$ ,  $z=-1.03$ ,  $p=0.30$ )). Lower FA values did not predict higher risk for "any DSM-IV diagnosis" ( $\beta=-1.03$ ,  $z=-0.74$ ,  $p=0.46$ ) either.

**TABLE S3.** Distribution of DAWBA probabilities (bands) at age 16 in the study sample.

| <i>Diagnoses</i>                                | <b>Subthreshold depression participants</b> |       |     |      |      |      | <b>Controls</b>              |       |     |      |      |      |
|-------------------------------------------------|---------------------------------------------|-------|-----|------|------|------|------------------------------|-------|-----|------|------|------|
|                                                 | <b>DAWBA bands at age 16</b>                |       |     |      |      |      | <b>DAWBA bands at age 16</b> |       |     |      |      |      |
|                                                 | <0.1%                                       | ~0.5% | ~3% | ~15% | ~50% | >70% | <0.1%                        | ~0.5% | ~3% | ~15% | ~50% | >70% |
| <b>Depression</b>                               | 16                                          | 40    | 0   | 14   | 8    | 3    | 118                          | 135   | 0   | 20   | 7    | 2    |
| <b>Generalized Anxiety Disorder</b>             | 46                                          | 21    | 1   | 13   | 0    | 0    | 208                          | 55    | 2   | 14   | 4    | 0    |
| <b>Social Phobia</b>                            | 16                                          | 58    | 3   | 4    | 0    | 0    | 51                           | 218   | 4   | 6    | 5    | 0    |
| <b>Panic Disorder</b>                           | 75                                          | 4     | 2   | 0    | 0    | 0    | 274                          | 5     | 3   | 1    | 1    | 0    |
| <b>Obsessive Compulsive Disorder</b>            | 51                                          | 25    | 5   | 0    | 0    | 0    | 235                          | 40    | 7   | 1    | 1    | 0    |
| <b>Attention Deficit Hyperactivity Disorder</b> | 55                                          | 16    | 3   | 3    | 2    | 0    | 235                          | 24    | 12  | 4    | 0    | 0    |
| <b>Oppositional-Defiant Disorder</b>            | 0                                           | 47    | 24  | 5    | 3    | 0    | 0                            | 212   | 58  | 3    | 2    | 0    |
| <b>Conduct Disorder</b>                         | 57                                          | 16    | 2   | 4    | 1    | 1    | 237                          | 35    | 1   | 6    | 0    | 4    |
| <b>Any DSM-IV diagnosis</b>                     | –                                           | 19    | 32  | 18   | 8    | 3    | –                            | 146   | 90  | 31   | 12   | 5    |



*Specificity of the clinical findings in the study sample*

Causal mediation analyses showed that higher scores of neuroticism and hopelessness accounted respectively for 46% ( $p=0.02$ ) and 41% ( $p=0.04$ ) of the relationship between subthreshold-depression at baseline and depression at age 16 (ST4).

Additionally, higher scores of neuroticism and hopelessness were associated with higher risk for "any DSM-IV diagnosis" at age 16 ( $\beta=0.021$ ,  $z=3.95$ ,  $p<0.001$  and  $\beta=0.040$ ,  $z=3.17$ ,  $p=0.002$  respectively).

Causal mediation analyses showed that higher scores of neuroticism and hopelessness respectively accounted for 44% ( $p=0.01$ ) and 25% ( $p=0.01$ ) of the relationship between subthreshold-depression at baseline and the DAWBA probability of having "any DSM-IV diagnosis" at age 16 (ST5).

**TABLE S4.** Causal mediation analyses on the relationship between subthreshold-depression at age 14 and depression at age 16 with scores for neuroticism and hopelessness and as mediator.

**Mediator variable:** Score for neuroticism at age 14

| <b>Effect type</b>                                                  | <b>Point estimate</b> | <b>95% CI</b>   | <b>p-value</b> |
|---------------------------------------------------------------------|-----------------------|-----------------|----------------|
| <b>Mediation effect</b>                                             |                       |                 |                |
| (subthreshold-depression at 14 -<br>neuroticism - depression at 16) | 0.036                 | [0.010;0.073]   | 0.01           |
| <b>Direct effect</b>                                                |                       |                 |                |
| (subthreshold-depression at 14 -<br>depression at 16)               | 0.044                 | [-0.020; 0.131] | 0.21           |
| <b>Total effect</b>                                                 | 0.080                 | [0.016; 0.172]  | 0.01           |
| <b>Proportion of total effect via mediation</b>                     | 0.464                 | [0.105; 1.864]  |                |

Point estimate: estimate of the size of the effect; 95% CI; 95% confidence interval of the point estimate.

**Mediator variable:** Score for hopelessness at age 14

| <b>Effect type</b>                                                   | <b>Point estimate</b> | <b>95% CI</b>   | <b>p-value</b> |
|----------------------------------------------------------------------|-----------------------|-----------------|----------------|
| <b>Mediation effect</b>                                              |                       |                 |                |
| (subthreshold-depression at 14 -<br>hopelessness - depression at 16) | 0.028                 | [0.010; 0.054]  | 0.04           |
| <b>Direct effect</b>                                                 |                       |                 |                |
| (subthreshold-depression at 14 -<br>depression at 16)                | 0.039                 | [-0.025; 0.126] | 0.25           |
| <b>Total effect</b>                                                  | 0.067                 | [0.004; 0.156]  | 0.04           |
| <b>Proportion of total effect via mediation</b>                      | 0.409                 | [0.081; 2.462]  |                |

Point estimate: estimate of the size of the effect; 95% CI; 95% confidence interval of the point estimate.

**TABLE S5.** Causal mediation analyses on the relationship between subthreshold-depression at age 14 and DAWBA probability for “any DSM-IV diagnosis” at age 16 with scores for neuroticism or hopelessness and as mediator.

**Mediator variable:** Score for neuroticism at age 14

| <b>Effect type</b>                                                                 | <b>Point estimate</b> | <b>95% CI</b>   | <b>p-value</b> |
|------------------------------------------------------------------------------------|-----------------------|-----------------|----------------|
| <b>Mediation effect</b>                                                            |                       |                 |                |
| (subthreshold-depression at 14 - neuroticism - probability of any diagnosis at 16) | 0.246                 | [0.097;0.419]   | 0.01           |
| <b>Direct effect</b>                                                               |                       |                 |                |
| (subthreshold-depression at 14 - probability of any diagnosis at 16)               | 0.319                 | [-0.068; 0.732] | 0.11           |
| <b>Total effect</b>                                                                | 0.565                 | [0.184; 0.970]  | <0.001         |
| <b>Proportion of total effect via mediation</b>                                    | 0.437                 | [0.158; 1.303]  |                |

Point estimate: estimate of the size of the effect; 95% CI; 95% confidence interval of the point estimate.

**Mediator variable:** Score for hopelessness at age 14

| <b>Effect type</b>                                                                  | <b>Point estimate</b> | <b>95% CI</b>  | <b>p-value</b> |
|-------------------------------------------------------------------------------------|-----------------------|----------------|----------------|
| <b>Mediation effect</b>                                                             |                       |                |                |
| (subthreshold-depression at 14 - hopelessness – probability of any diagnosis at 16) | 0.136                 | [0.032; 0.263] | 0.01           |
| <b>Direct effect</b>                                                                |                       |                |                |
| (subthreshold-depression at 14 - probability of any diagnosis at 16)                | 0.414                 | [0.049; 0.819] | 0.03           |
| <b>Total effect</b>                                                                 | 0.550                 | [0.192; 0.948] | 0.01           |
| <b>Proportion of total effect via mediation</b>                                     | 0.249                 | [0.055; 0.751] |                |

Point estimate: estimate of the size of the effect; 95% CI; 95% confidence interval of the point estimate.

*Reproducibility of the findings in a distinct sample*

In the 686 healthy adolescents at baseline, lower FA values in tracts spanning from the anterior corpus callosum cluster to the anterior cingulate cortex predicted higher risk for depression at age 16 ( $\beta=-0.04$ ,  $z=-2.19$ ,  $p=0.028$ ).

*Specificity of the findings in the distinct sample*

The DAWBA "bands" distribution is described in ST6.

In the 686 healthy adolescents at baseline, lower FA values did not predict higher risk for any other diagnosis (generalized anxiety disorder ( $\beta=-0.01$ ,  $z=-0.47$ ,  $p=0.64$ ), social phobia ( $\beta=-0.01$ ,  $z=-0.43$ ,  $p=0.66$ ), panic disorder ( $\beta=-0.09$ ,  $z=-1.32$ ,  $p=0.19$ ), obsessive compulsive disorder ( $\beta=-0.03$ ,  $z=-0.76$ ,  $p=0.45$ ), attention deficit hyperactivity disorder ( $\beta=-0.05$ ,  $z=-1.56$ ,  $p=0.12$ ), odd ( $\beta=-0.02$ ,  $z=-1.05$ ,  $p=0.29$ ), or conduct disorders at follow-up ( $\beta=-0.01$ ,  $z=-0.39$ ,  $p=0.69$ ). Lower FA did not predict risk for "any DSM-IV diagnosis" ( $\beta=-0.02$ ,  $z=-1.18$ ,  $p=0.24$ ).

**TABLE S6.** Distribution of DAWBA probabilities (bands) at age 16 in 686 healthy adolescents at age 14.

| <i>Diagnoses</i>                                | <b>DAWBA bands at age 16</b> |       |     |      |      |      |
|-------------------------------------------------|------------------------------|-------|-----|------|------|------|
|                                                 | <0.1%                        | ~0.5% | ~3% | ~15% | ~50% | >70% |
| <b>Depression</b>                               | 252                          | 338   | 0   | 67   | 15   | 3    |
| <b>Generalized Anxiety Disorder</b>             | 0                            | 528   | 104 | 36   | 4    | 0    |
| <b>Social Phobia</b>                            | 218                          | 412   | 12  | 22   | 10   | 0    |
| <b>Panic Disorder</b>                           | 645                          | 21    | 0   | 6    | 2    | 0    |
| <b>Obsessive Compulsive Disorder</b>            | 565                          | 97    | 6   | 5    | 1    | 0    |
| <b>Attention Deficit Hyperactivity Disorder</b> | 544                          | 96    | 23  | 1    | 0    | 0    |
| <b>Oppositional-Defiant Disorder</b>            | 0                            | 490   | 154 | 19   | 5    | 2    |
| <b>Conduct Disorder</b>                         | 532                          | 100   | 12  | 24   | 15   | 3    |
| <b>Any DSM-IV diagnosis</b>                     | —                            | 293   | 247 | 108  | 40   | 4    |

## REFERENCES

1. Schumann G, Loth E, Banaschewski T, et al: The IMAGEN study: reinforcement-related behaviour in normal brain function and psychopathology. *Mol Psychiatry* 2010; 15(12):1128-1139. Supplementary Table 1.
2. Smith SM: Fast robust automated brain extraction. *Hum Brain Mapp* 2002; 17(3):143-155
3. Imai K, Keele L, Tingley D: A general approach to causal mediation analysis. *Psychol Methods* 2010; 15(4):309-334
